# Supplementary material for: Corticotropin Releasing Factor Type 1 and 2 Receptor Signaling in the Medial Prefrontal Cortex Modulates Binge-Like Ethanol Consumption in C57BL/6J Mice
Source: MDPI journal article supplement (doi:10.3390/brainsci9070171), 2019-07-19
Supplement: s1 [file s1]

## METHODS

Western blots were performed as previously described [1]. In brief, four mice  $\geq 8$  weeks old (2 male and 2 female) were rapidly decapitated and brains extracted and flash frozen. A cryostat was used to collect bilateral punches of tissue (1mm x 1mm cylindrical punch) from the mPFC. Tissue punches were manually homogenized by pipetting with 100  $\mu$ l lysis buffer [320 mM sucrose, 1% SDS, 5 mM HEPES buffer, and 1% Halt 100x Protease/Phosphatase Inhibitor Cocktail (Thermo Fisher Scientific, Rockford, IL)]. Protein concentrations were determined for each sample using the BCA Protein Assay Kit (Thermo Fisher Scientific), so that a total of 25  $\mu$ g of total protein was loaded onto 4–20% Mini-Protean® TGX™ Precast Protein Gels (Bio-Rad, Hercules, CA). Samples were then transferred to PVDF membranes and dried overnight. After reactivation, samples were blocked in Odyssey® Blocking Buffer (Li-COR, Lincoln, NE) for 1 h, were incubated before a 2.5 h incubation with primary antibodies (1:2000 GAPDH (#2118 Cell Signaling Technology Boston, MA) and 1:2500 CRF2R (ab104368 Abcam, Cambridge, MA) in 0.2% Tween in blocking buffer at RT. Membranes were serially washed with phospho-buffered saline with 0.1% Tween-20 (PBST) before an hour incubation of anti-rabbit secondary (1:5000 secondary; 0.1% SDS, and 0.2% Tween). After a series of washes in PBST, membrane blots were imaged using Image Studio™ installed on a Dell Optiplex 7010 workstation coupled with Odyssey® FC (Li-COR). As westerns were performed for qualitative rather than quantitative analysis, images were not analyzed. Antibodies were not validated with the use of CRF2R knockout tissue.

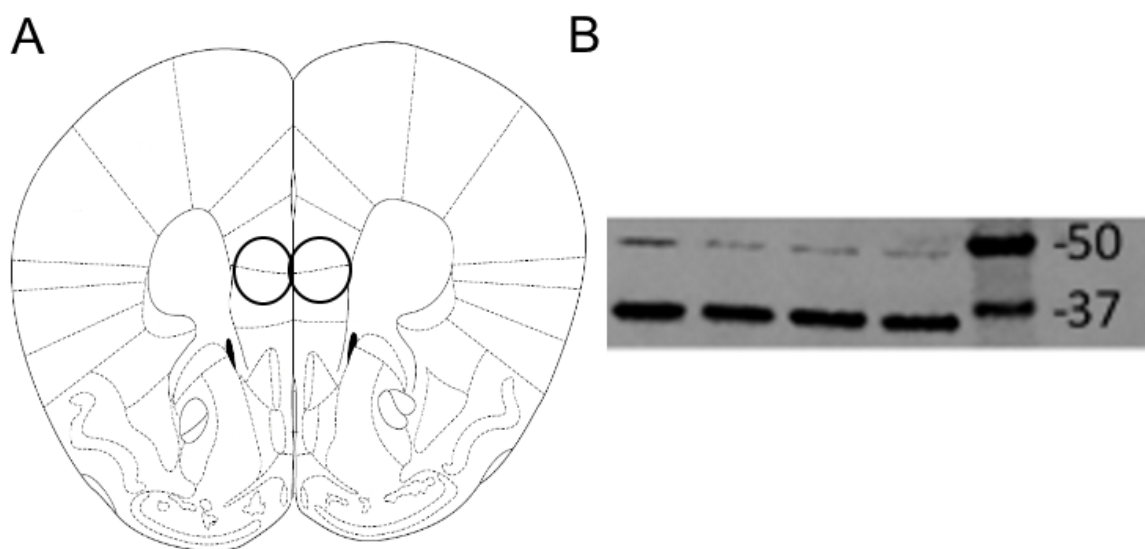

**Figure S1.** CRF2R is expressed in C57BL/6J mouse mPFC. **A.** Approximate area of tissue punches taken for western blot analysis. **B.** Qualitative western blot demonstrating the expression of the CRF 2 receptor in the mPFC. CRF2R band ~50; GAPDH housekeeping band ~37. Blot contains 2 male (lane 1 and 2) and 2 female (lane 3 and 4) mice.

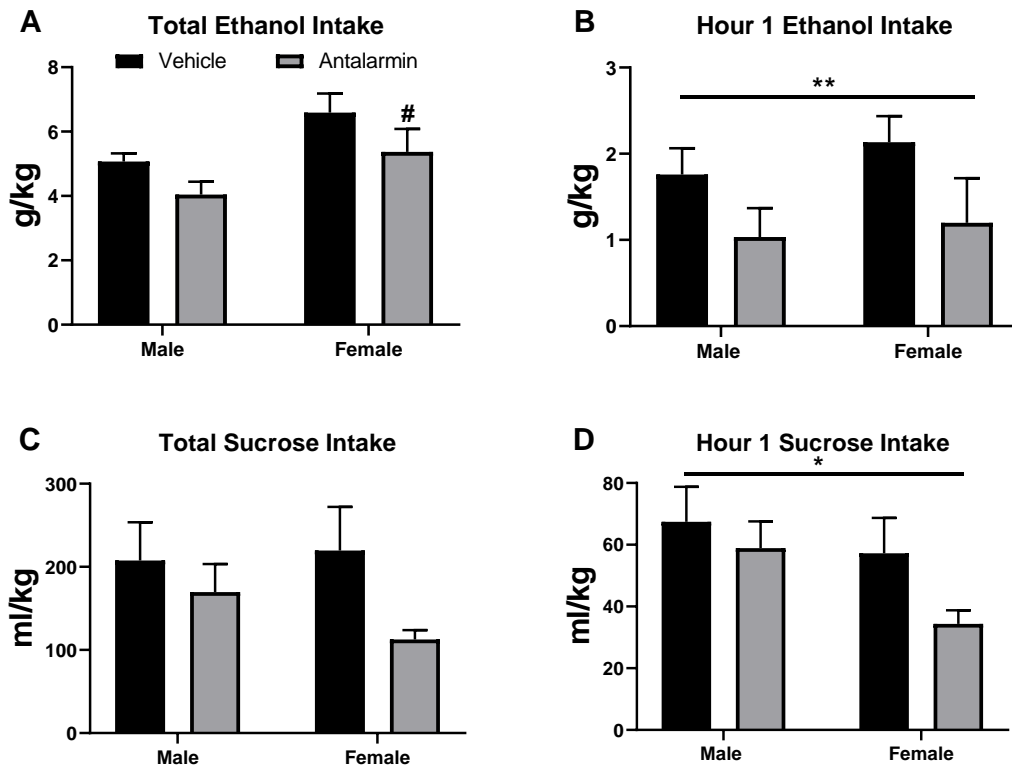

**Figure S2.** mPFC CRF1R antagonism impact by sex. **A.** In total ethanol intake, two-way ANOVA found a significant impact of treatment ( $F(1, 11) = 10.83$ ;  $p < 0.01$ ) and a trending towards significance impact of sex ( $F(1, 11) = 4.113$ ;  $p = .07$ ), but not an interaction between the two factors ( $F(1, 11) = 0.08231$ ;  $p > 0.05$ ). Given the trend towards an effect of sex, we performed Bonferroni's multiple comparisons test. This post hoc detected a sex-specific significant treatment impact in which total intake was significantly decreased in females ( $p < 0.05$ ) but not males ( $p > 0.05$ ). Male  $N = 6$ , Female  $N = 7$ . **B.** In the first hour of ethanol intake (when treatment had the strongest impact), two-way ANOVA found a significant impact of treatment ( $F(1, 11) = 10.52$ ;  $p < 0.01$ ), but not sex ( $F(1, 11) = 0.3097$ ;  $p > 0.05$ ) nor an interaction between the two factors ( $F(1, 11) = 0.1678$ ;  $p > 0.05$ ). Male  $N = 6$ , Female  $N = 7$ . **C.** In total sucrose intake, two-way ANOVA found a trending significant impact of treatment ( $F(1, 10) = 4.148$ ;  $p = 0.07$ ), but not sex ( $F(1, 10) = 0.2595$ ;  $p > 0.05$ ) nor an interaction between the two factors ( $F(1, 10) = 0.9367$ ;  $p > 0.05$ ). Male  $N = 5$ , Female  $N = 7$ . **D.** In the first hour of sucrose intake, two-way ANOVA found a significant impact of treatment ( $F(1, 10) = 6.065$ ;  $p < 0.05$ ), but not sex ( $F(1, 10) = 2.197$ ;  $p > 0.05$ ) nor an interaction between the two factors ( $F(1, 10) = 1.272$ ;  $p > 0.05$ ). Male  $N = 5$ , Female  $N = 7$ . Two-way ANOVA treatment factor significance \* =  $p < 0.05$ ; \*\* =  $p < 0.01$ ; Bonferroni's multiple comparisons test significance # =  $p < 0.05$ .

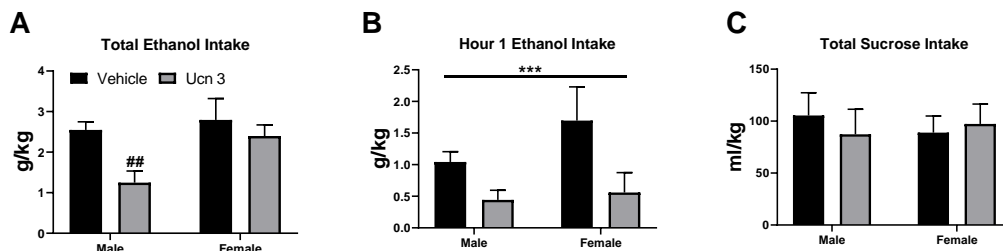

**Figure S3.** mPFC CRF2R agonism impact by sex. **A.** In total ethanol intake, two-way ANOVA found a significant impact of treatment  $F(1, 12) = 8.623$ ;  $p < 0.05$ , but not sex ( $F(1, 12) = 3.994$ ;  $p > 0.05$ ) nor an interaction between the two factors ( $F(1, 12) = 2.432$ ;  $p > 0.05$ ). As the sex factor boarded on significance ( $p = 0.07$ ), Bonferroni's multiple comparisons test was performed. Post hoc detected a sex-

specific significant treatment impact in which male ( $p < 0.01$ ), but no female ( $p > 0.05$ ) was significantly reduced by treatment. Male  $N = 9$ , Female  $N = 5$ . **B.** In the first hour of ethanol intake (when treatment had the strongest impact), two-way ANOVA found a significant impact of treatment ( $F(1, 12) = 19.92$ ;  $p < 0.001$ ), but not sex ( $F(1, 12) = 1.374$ ;  $p > 0.05$ ) nor an interaction between the two factors ( $F(1, 12) = 1.915$ ;  $p > 0.05$ ). Male  $N = 9$ , Female  $N = 5$ . **C.** In total sucrose intake, two-way ANOVA found no significant impact of treatment ( $F(1, 7) = 0.1388$ ;  $p > 0.05$ ), sex ( $F(1, 7) = 0.01399$ ;  $p > 0.05$ ) nor an interaction between the two factors ( $F(1, 7) = 1.019$ ;  $p > 0.05$ ). Male  $N = 5$ , Female  $N = 4$ . Two-way ANOVA treatment factor significance \*\*\* =  $p < 0.001$ . Sidak's multiple comparisons significance ## =  $p < .001$ .

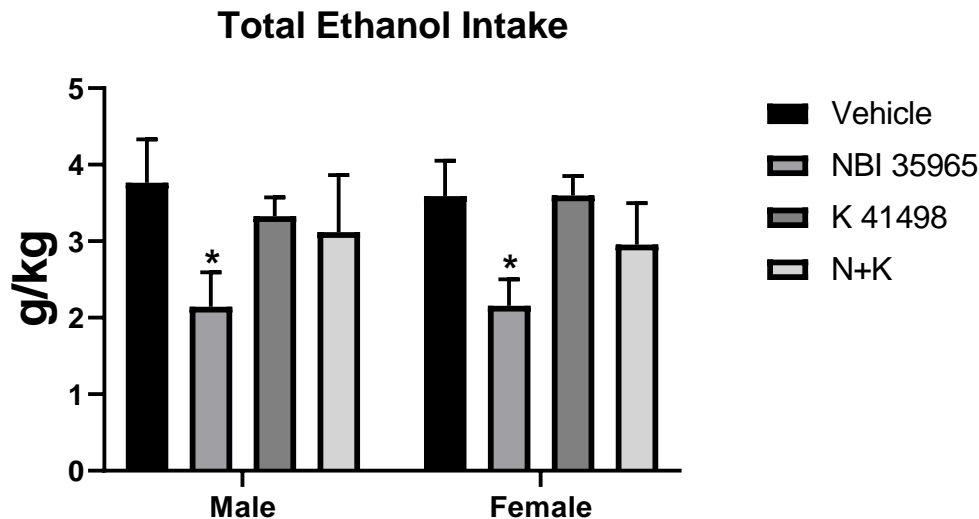

**Figure S4.** mPFC CRF1R+CRF2R antagonism impact by sex. **A.** In total ethanol intake, two-way ANOVA found a significant impact of treatment ( $F(3, 17) = 3.486$ ;  $p < 0.05$ ), but not sex ( $F(1, 17) = 0.001347$ ;  $p > 0.05$ ) nor an interaction between the two factors ( $F(3, 17) = 0.08616$ ;  $p > 0.05$ ). Vehicle male  $N = 3$ , female  $N = 3$ ; NBI 35965 male  $N = 4$ , female  $N = 2$ ; K 41498 male  $N = 5$ , female  $N = 2$ ; NBI 35965 + K 41498 male  $N = 4$ , female  $N = 3$ . Two-way ANOVA treatment factor significance \* =  $p < 0.05$ .

## REFERENCES

1. Rinker, J.A.; Marshall, S.A.; Mazzone, C.M.; Lowery-Gionta, E.G.; Gulati, V.; Pleil, K.E.; Kash, T.L.; Navarro, M.; Thiele, T.E. Extended Amygdala to Ventral Tegmental Area Corticotropin-Releasing Factor Circuit Controls Binge Ethanol Intake. *Biol. Psychiatry* **2017**, *81*, 930–940.
